# Supplementary material for: Cross-linked sulfonated poly(ether imide)/silica organic–inorganic hybrid materials: proton exchange membrane properties
Source: Royal Society of Chemistry journal article supplement (doi:10.1039/c4ra02137a), 2014-01-01
Supplement: c4ra02137a1.pdf [file c4ra02137a1.pdf]

## **Electronic Supporting Information**

### **Cross-linked Sulfonated Poly(ether imide)/silica Organic–inorganic Hybrid**

#### **Materials: Proton Exchange Membrane Properties**

**Ershad Ali Mistri, Susanta Banerjee\***

Materials Science Centre, Indian Institute of Technology Kharagpur,

Kharagpur-721302, India

E-mail: [susanta@matsc.iitkgp.ernet.in](mailto:susanta@matsc.iitkgp.ernet.in) (S. Banerjee)

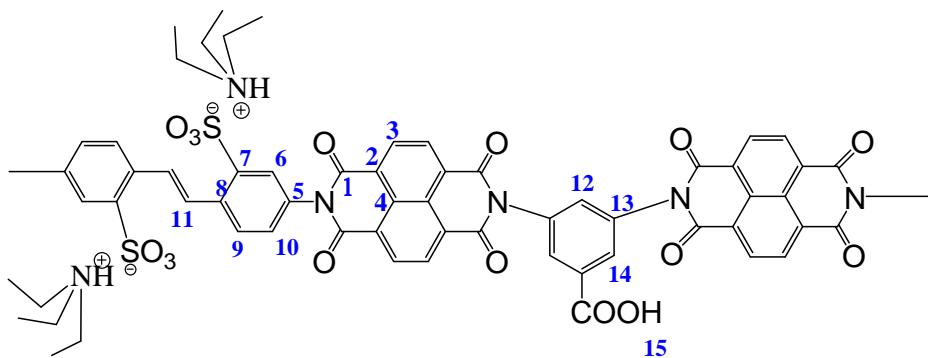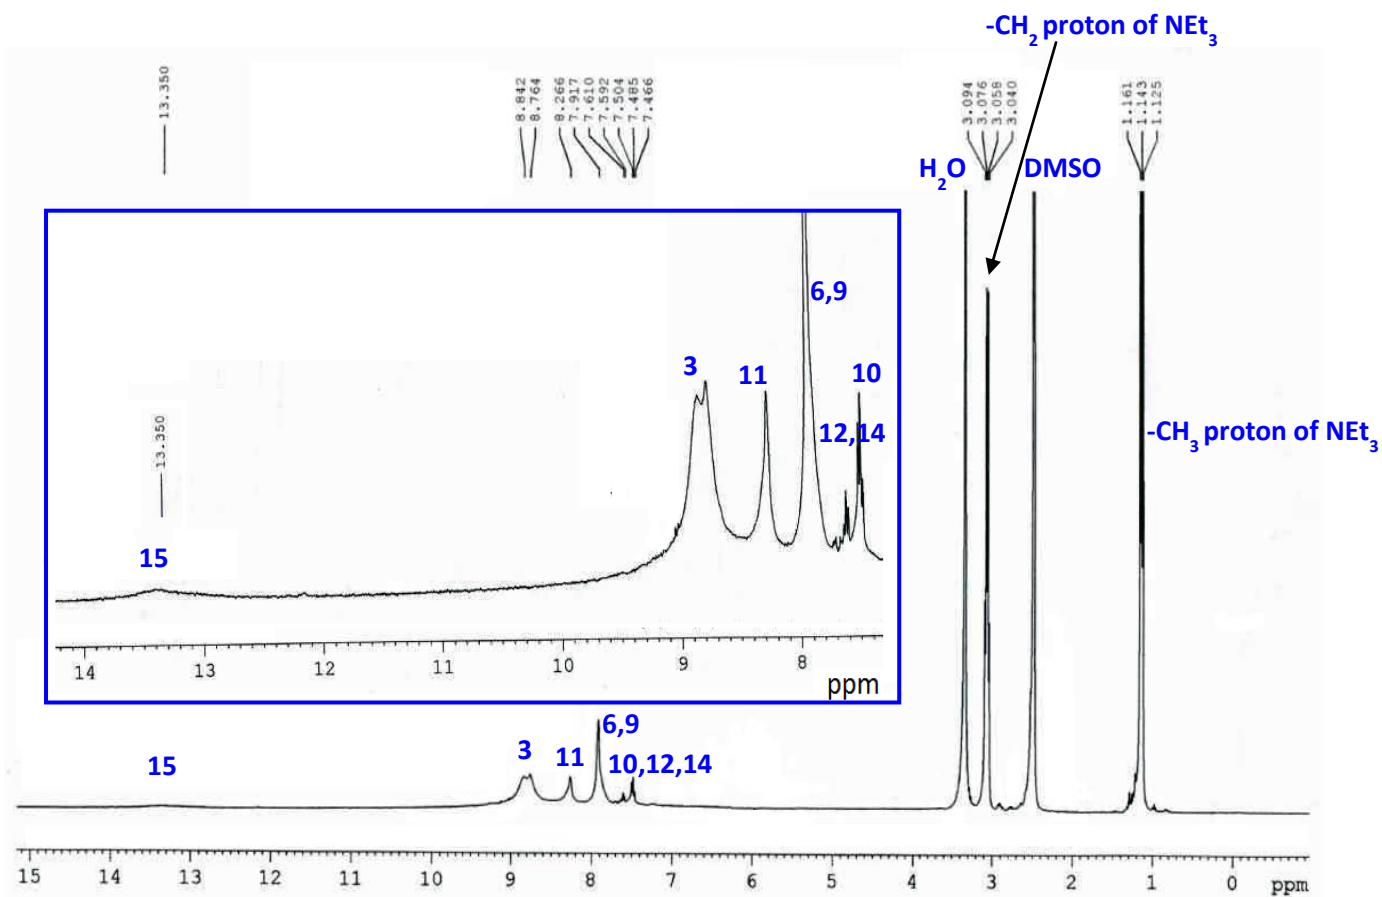

**Figure S1.**  $^1\text{H-NMR}$  spectrum of DDN-70 (model compound)

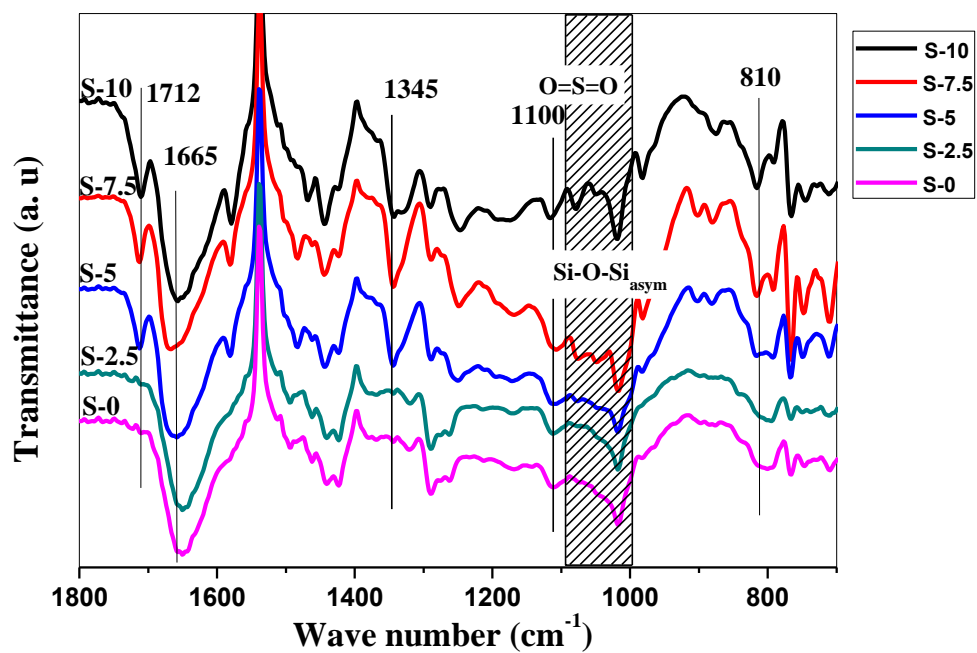

**Figure S2.** FT-IR spectra of the SPI/S-X membranes

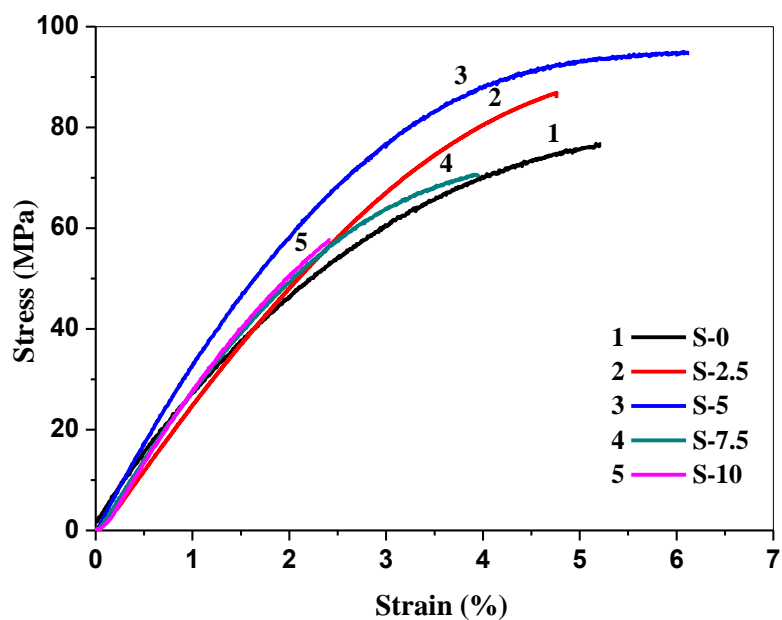

**Figure S3.** Stress–strain plot of the SPI/S-X membranes.

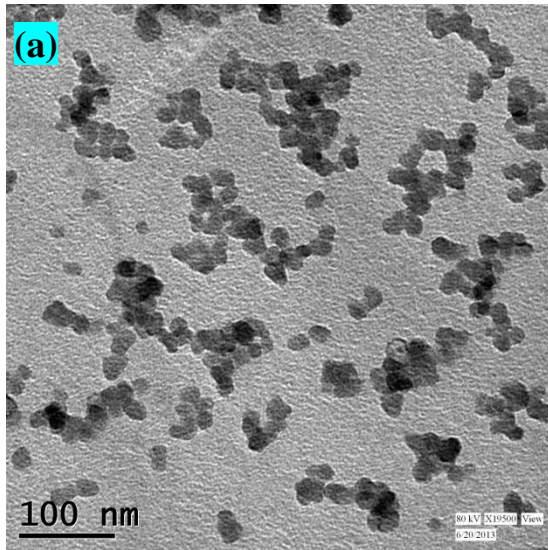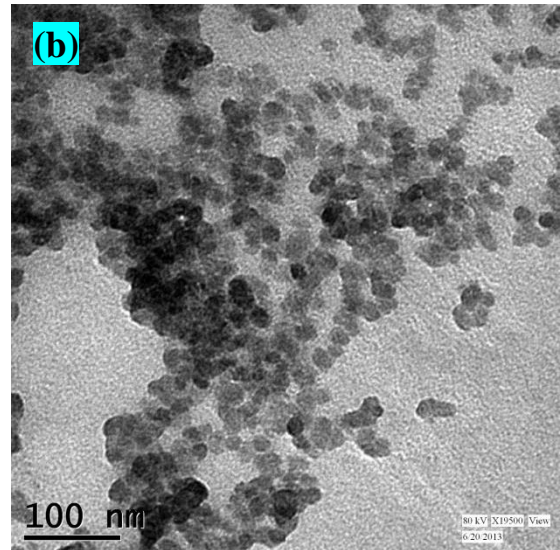

**Figure S4.** TEM images of the SPI/silica solution in DMSO (a) SPI/S-5; (b) SPI/S-10.
